# Supplementary material
Source: MDPI journal article supplement (https://www.mdpi.com/2227-9717/9/12/2193)
Supplement: s1 [file s1]

## Supplementary File

# Back-channel etched In-Ga-Zn-O Thin-film Transistor utilizing Selective Wet-Etching of Copper Source and Drain

Rauf Khan <sup>1,2,\*</sup>, Muhamad Affiq Bin Misran <sup>1,2</sup>, Michitaka Ohtaki<sup>1,2</sup>, Jun Tae Song<sup>3,4</sup>, Tatsumi Ishihara<sup>3,4</sup> and Reiji Hattori <sup>1</sup>

<sup>1</sup> Department of Applied Science for Electronics and Materials, Interdisciplinary Graduate School of Engineering Sciences, Kyushu University, Fukuoka 816-8580, Japan; [muhamad.affiq90@gmail.com](mailto:muhamad.affiq90@gmail.com) (M.A); [ohtaki@kyudai.jp](mailto:ohtaki@kyudai.jp) (M.O); [hattori@gic.kyushu-u.ac.jp](mailto:hattori@gic.kyushu-u.ac.jp) (R.H.)

<sup>2</sup> Transdisciplinary Research and Education Center for Green Technologies, Kyushu University, Fukuoka 816-8580, Japan

<sup>3</sup> Department of Applied Chemistry, Faculty of Engineering, Kyushu University, Fukuoka, 819-0395, Japan; [song.juntae@cstf.kyushu-u.ac.jp](mailto:song.juntae@cstf.kyushu-u.ac.jp) (J.S); [ishihara@cstf.kyushu-u.ac.jp](mailto:ishihara@cstf.kyushu-u.ac.jp) (T.I)

<sup>4</sup> WPI, International Institute for Carbon-Neutral Energy Research (WPI-I2CNER), Kyushu University, Fukuoka, 819-0395, Japan

\* Correspondence: [rauful.karim@gmail.com](mailto:rauful.karim@gmail.com)

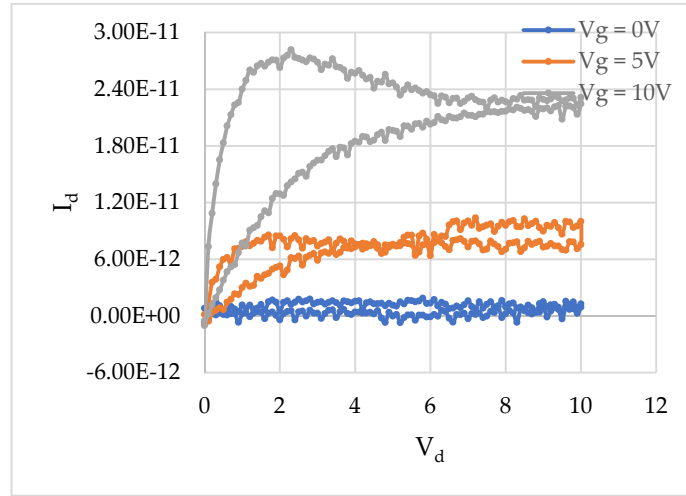

(a)

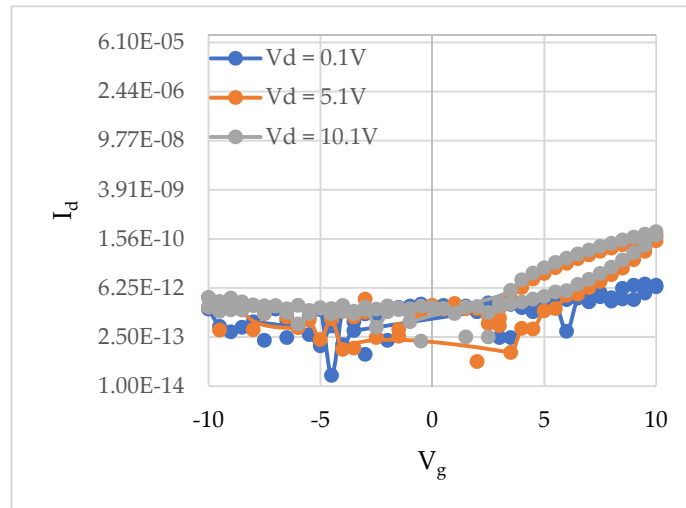

(b)

Figure S1: (a) Output and (b) transfer characteristics of IGZO TFT without passivation layer ( $W/L = 10 \mu\text{m}/20 \mu\text{m}$ ) after annealing in  $\text{N}_2$  atmosphere for 1 hour.

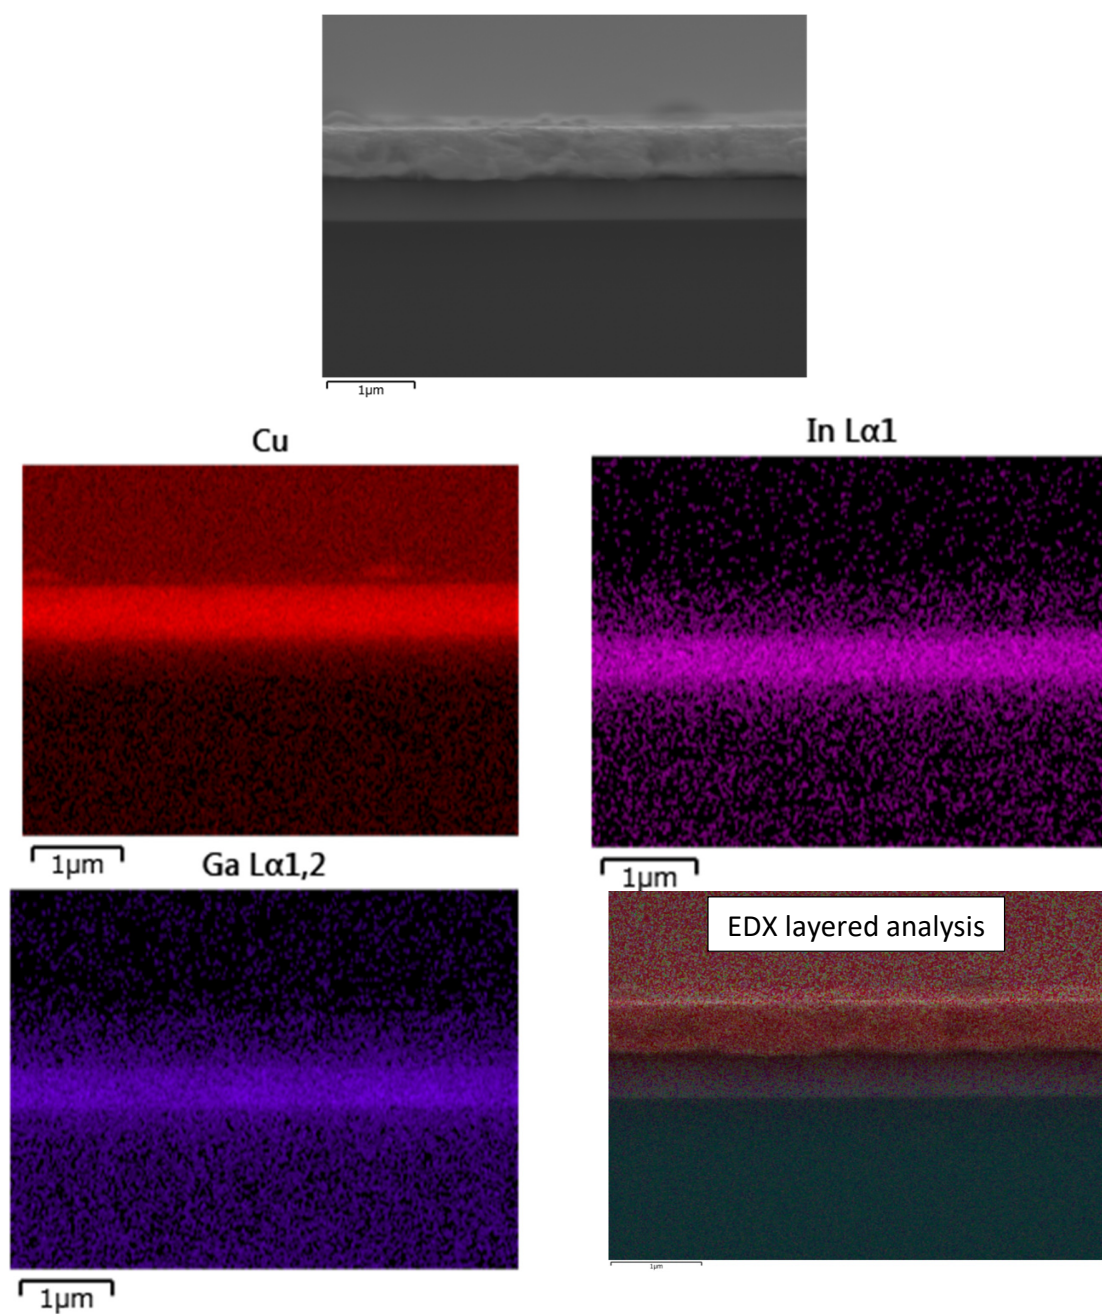

Figure S2: Mapping analysis of sample A before post annealing.

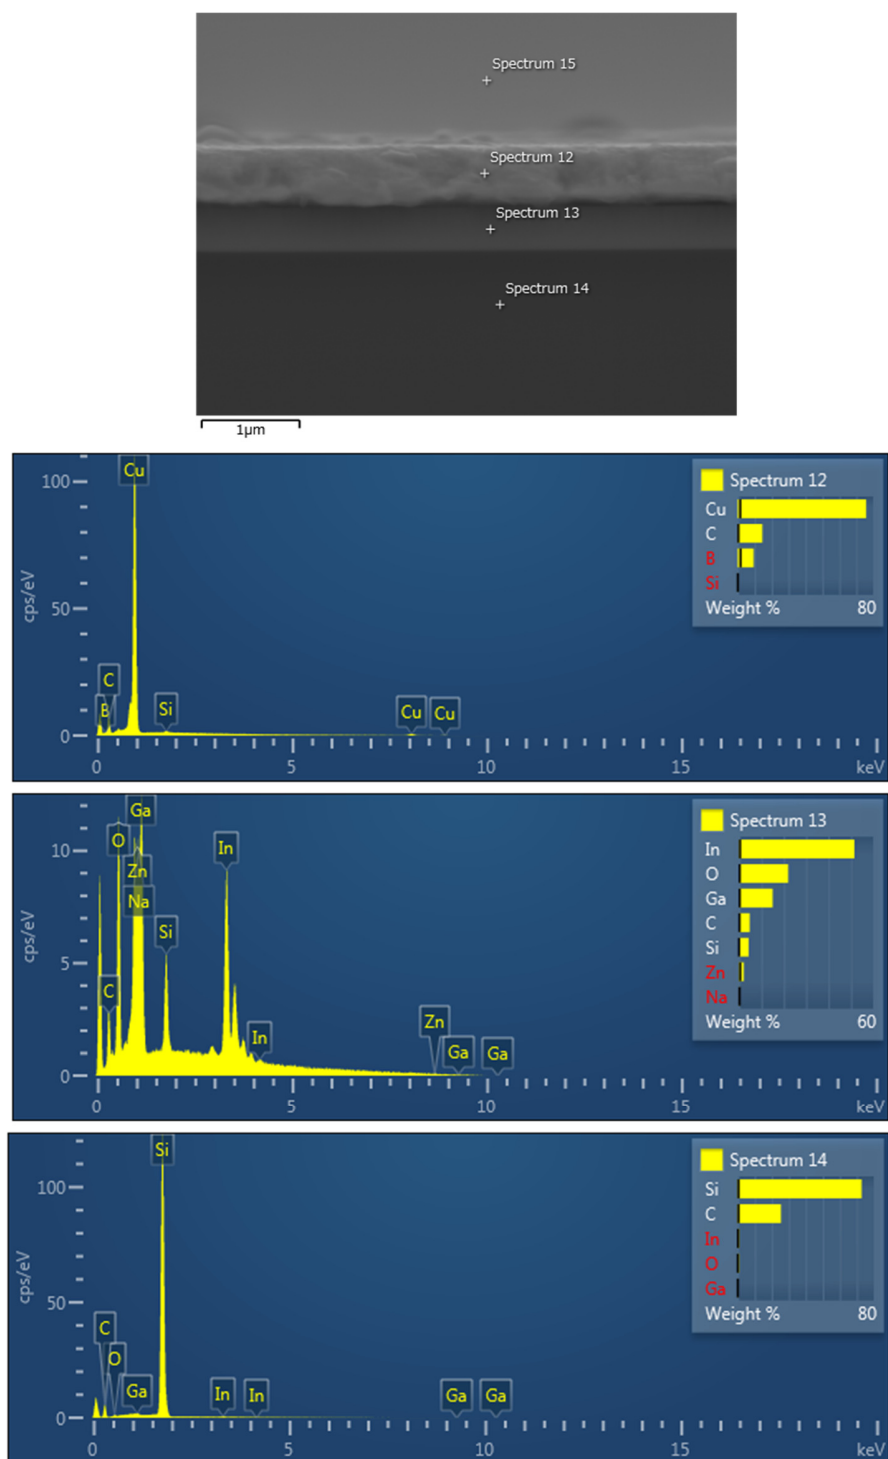

Figure S3: Spectrum analysis of sample A before post annealing.

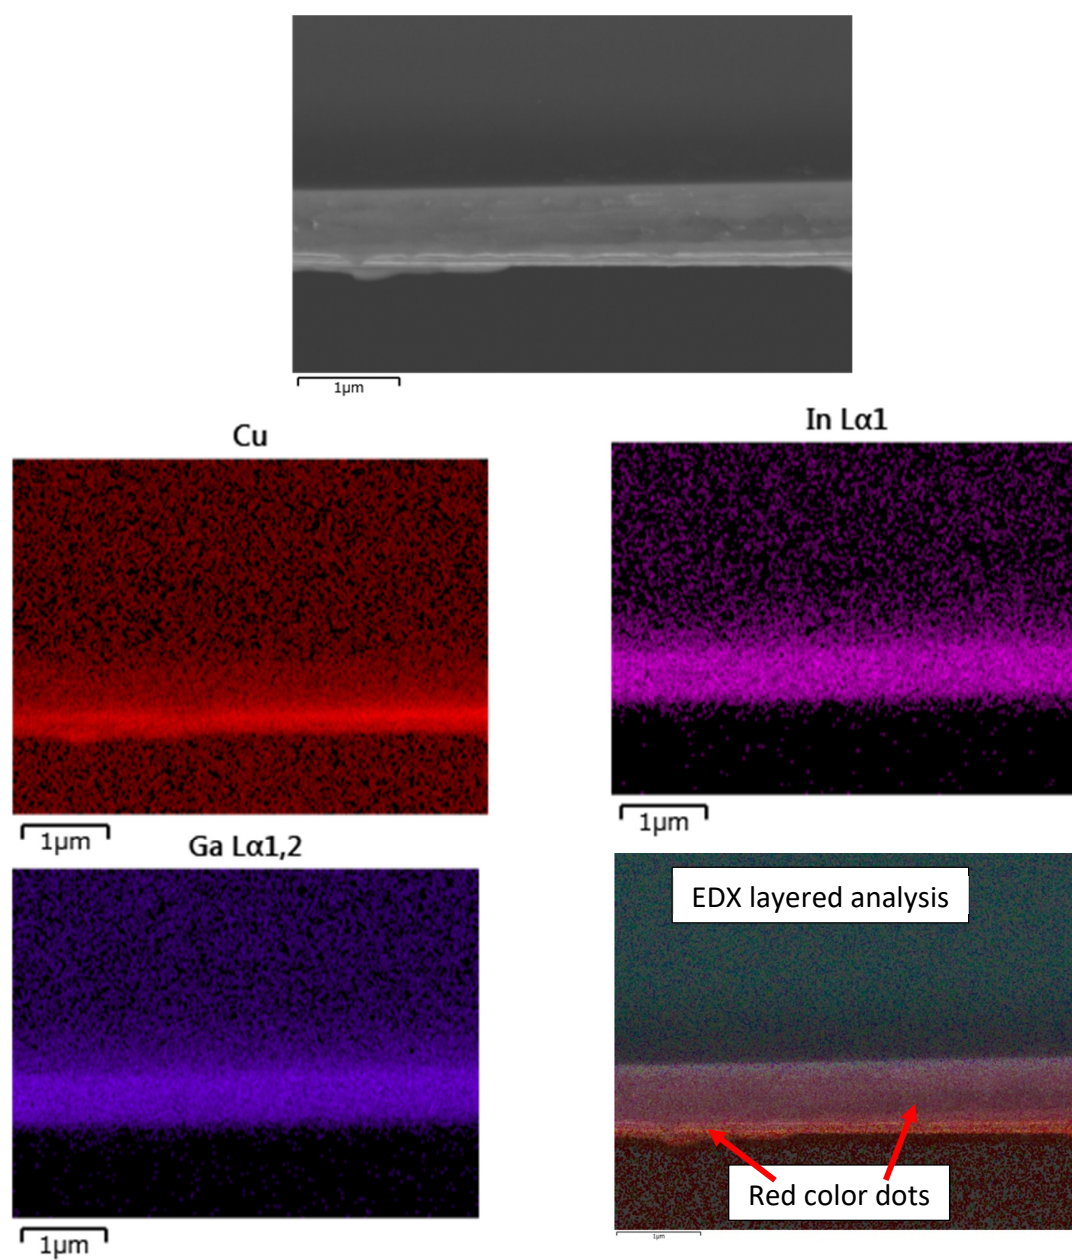

Figure S4: Mapping analysis of sample A after post annealing.

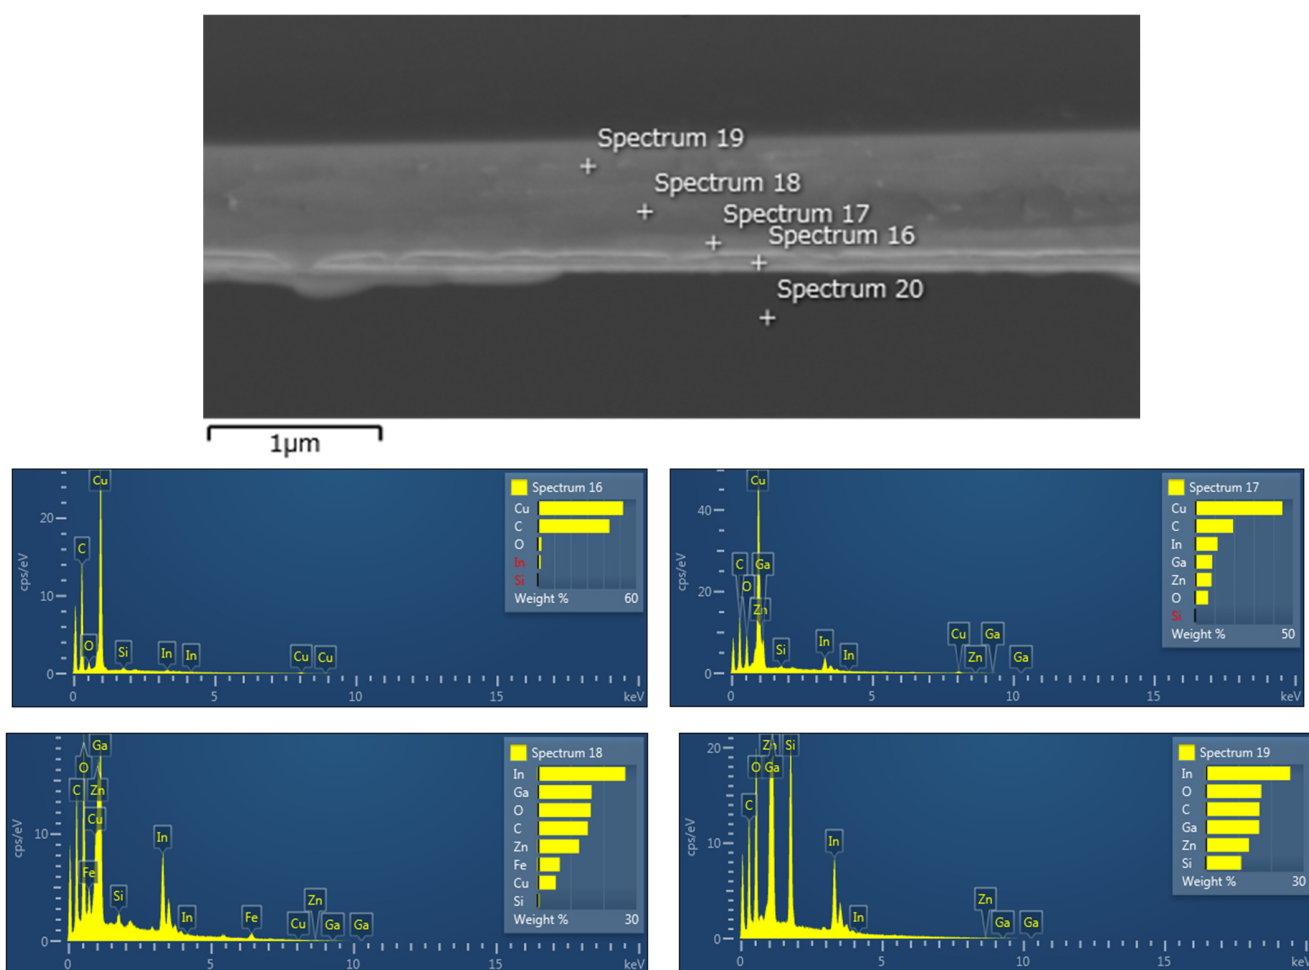

Figure S5: Spectrum analysis of sample A after post annealing.

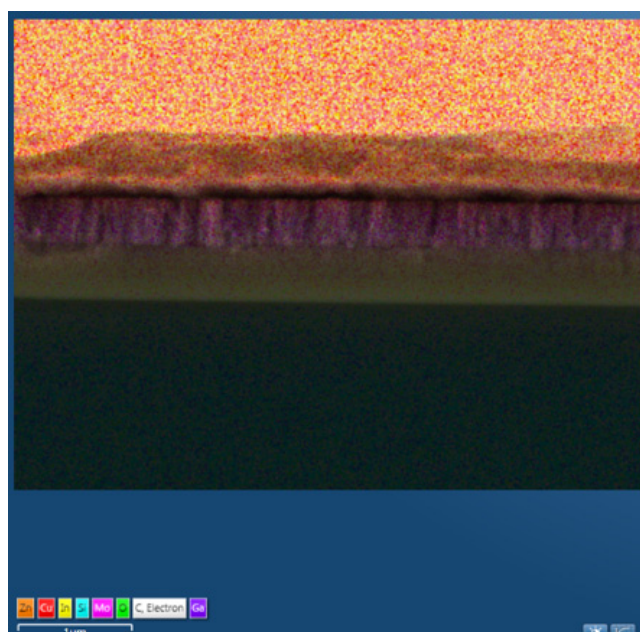

Figure S6: The EDX layered analysis of Sample B before post annealing.



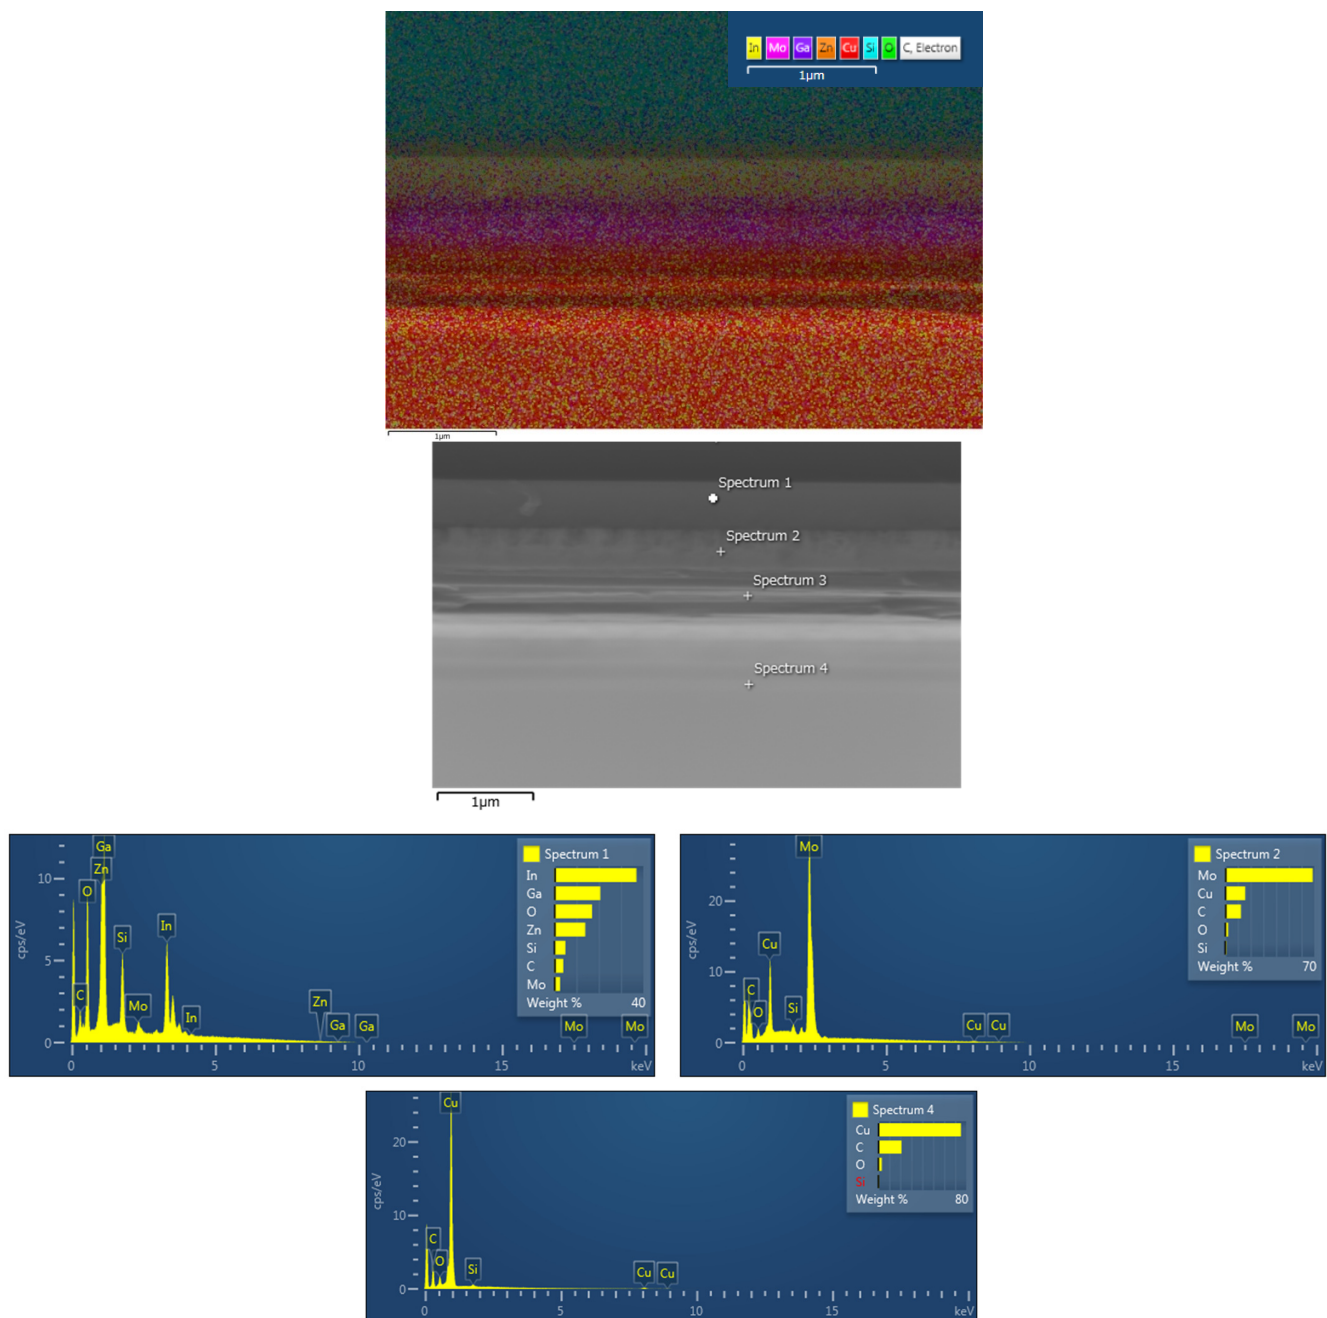

Figure S7: The EDX layered analysis and spectrum analysis of Sample B after post annealing.
